# Supplementary material for: Artificial substrata increase pond farming density of grass carp ( Ctenopharyngodon idella ) by increasing the bacteria that participate in nitrogen and phosphorus cycles in pond water
Source: PeerJ journal article supplement (doi:10.7717/peerj.7906), 2019-10-14
Supplement: Figure_S2.pdf [file Figure_S2.pdf]

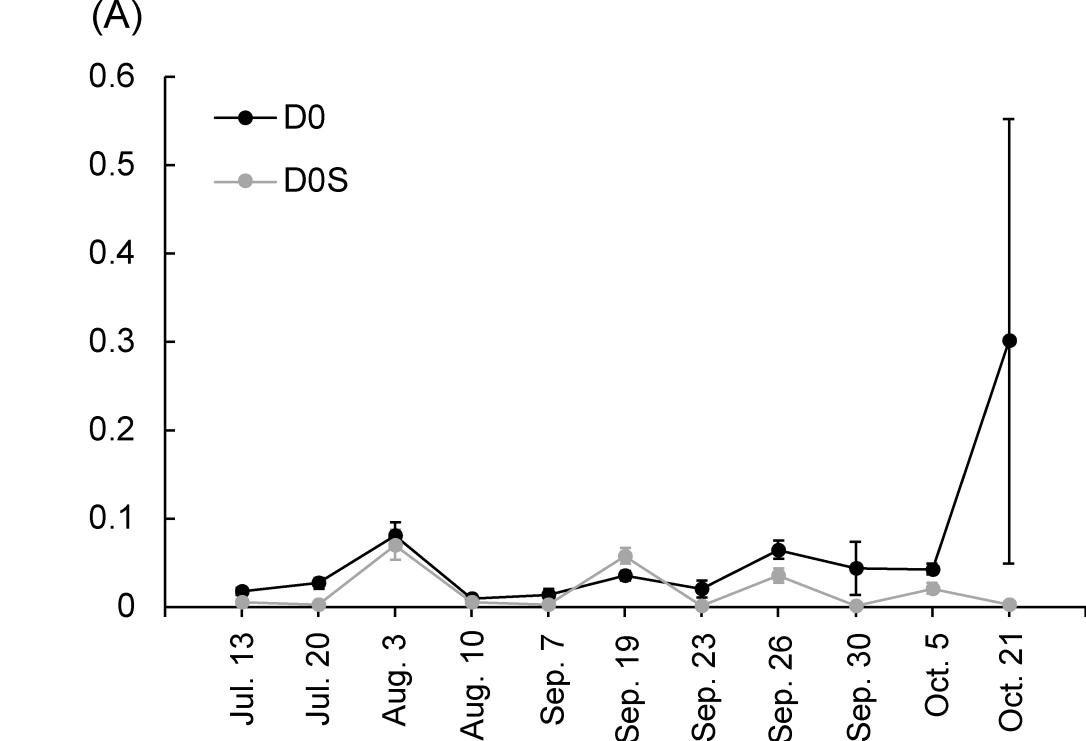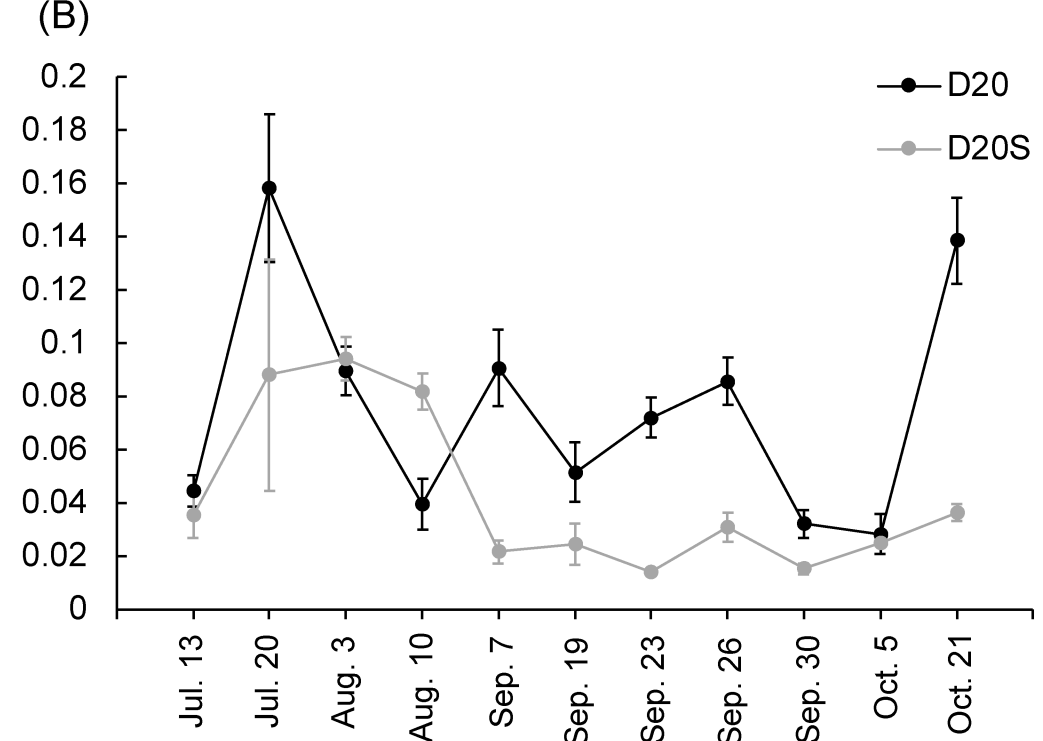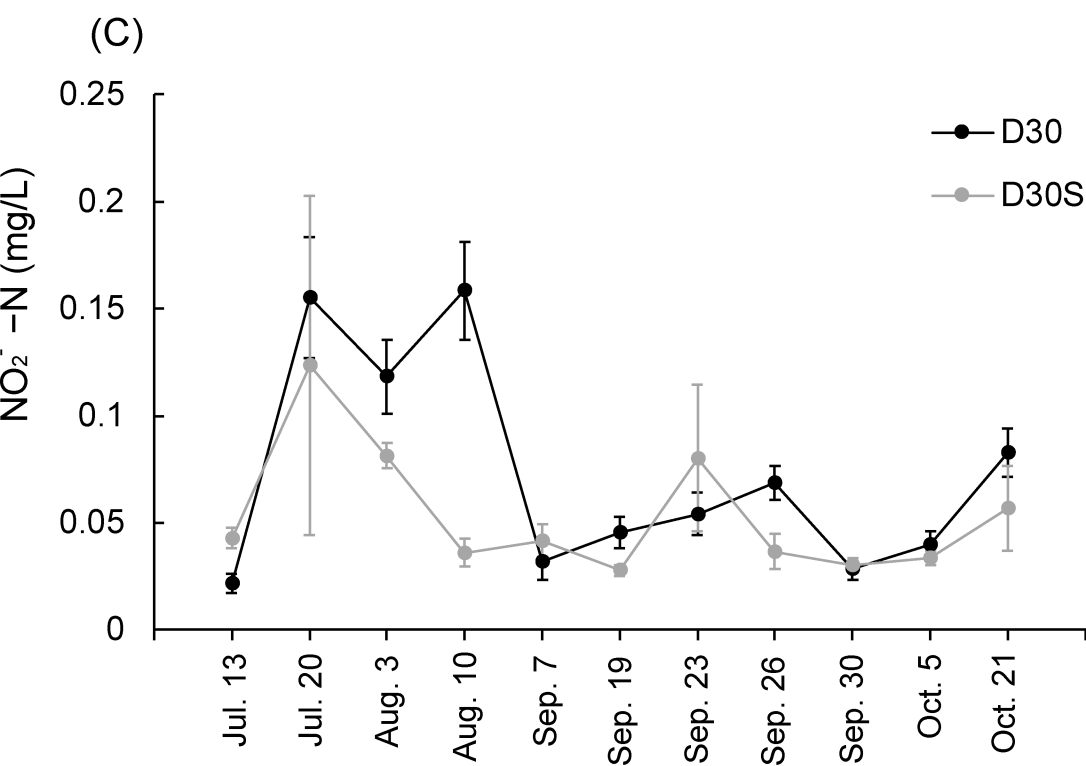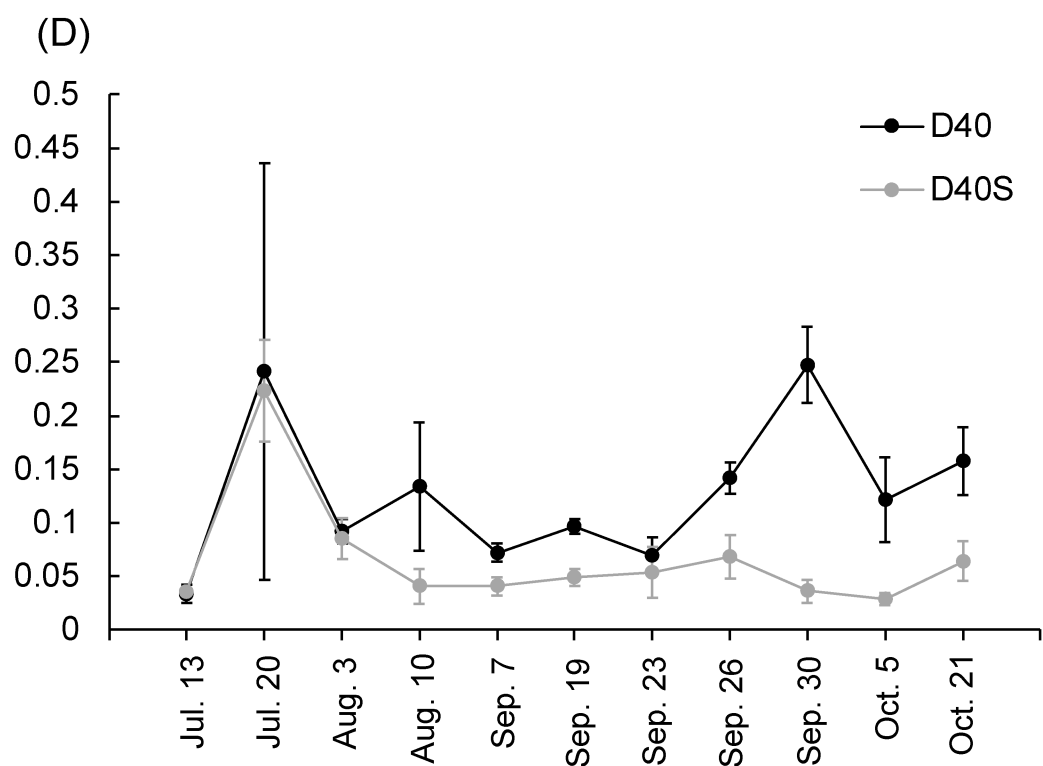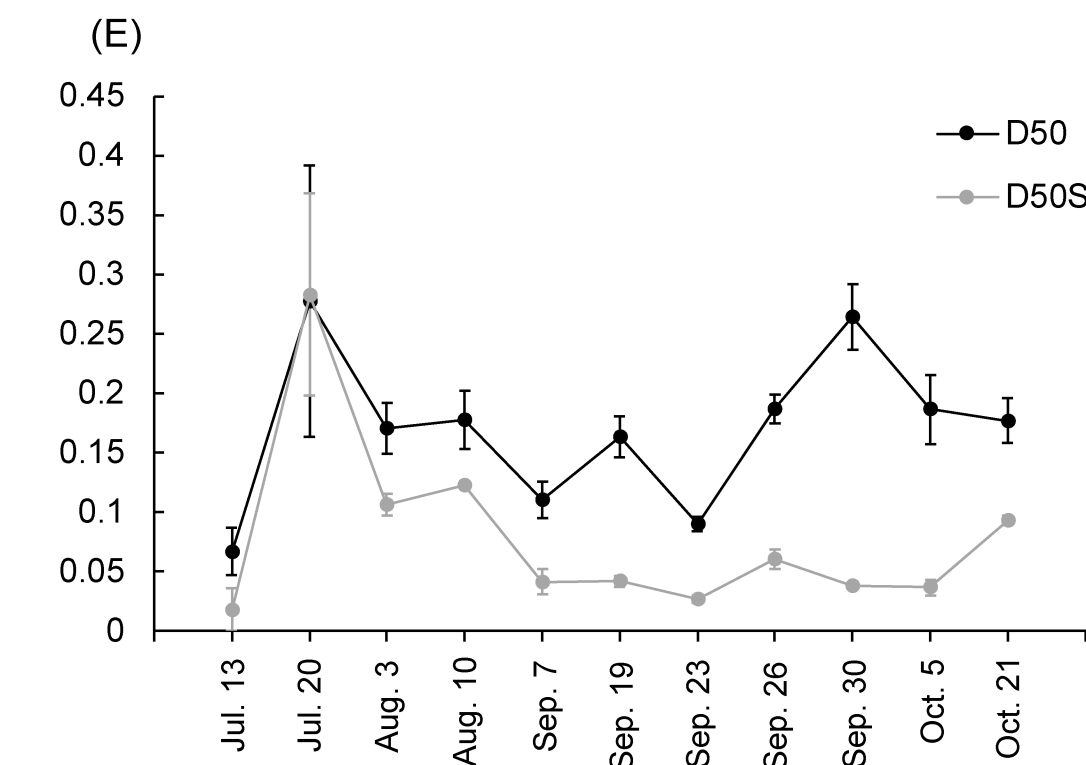

Sampling date
