# Supplementary material for: Artificial substrata increase pond farming density of grass carp (Ctenopharyngodon idella) by increasing the bacteria that participate in nitrogen and phosphorus cycles in pond water
Source: PeerJ. 2019 Oct 14;7:e7906. doi: 10.7717/peerj.7906 (PMC6796960; doi:10.7717/peerj.7906)
Supplement: Table S1 — Different letters indicate statistical difference among levels within a variation source. DO: dissolved oxygen; WT, water temperature. [file peerj-07-7906-s001.xlsx]

## Sheet: Sheet1
Table S1. Physical and chemical parameters of ponds farmed gross crop with different stocking densities.
	D0	D0+S2	D20	D20+S2	D30	D30+S2	D40	D40+S2	D50	D50+S2
WT	26.75±1.99	26.99±2.07	27.08±2.00	26.80±2.44	26.89±1.99	27.67±1.78	26.98±2.72	27.74±1.67	27.51±2.04	27.81±2.02
DO	7.60±0.30c	7.59±0.25c	6.69±0.61b	6.01±0.86a	5.89±0.85a	5.60±1.03a	5.58±0.64a	5.46±1.11a	5.55±0.59a	5.26±1.43a
pH	8.15±0.10b	8.15±0.22b	6.69±0.74a	6.69±0.69a	6.56±0.71a	6.71±0.66a	6.50±0.64a	6.36±0.85a	6.45±0.70a	6.33±0.88a
Different letters indicate statistical difference among levels within a variation source. DO: dissolved oxygen; WT, water temperature.
